# Supplementary material
Source: PubMed Central journal article supplement (PMC3389741)

### 3. Selected spectral data

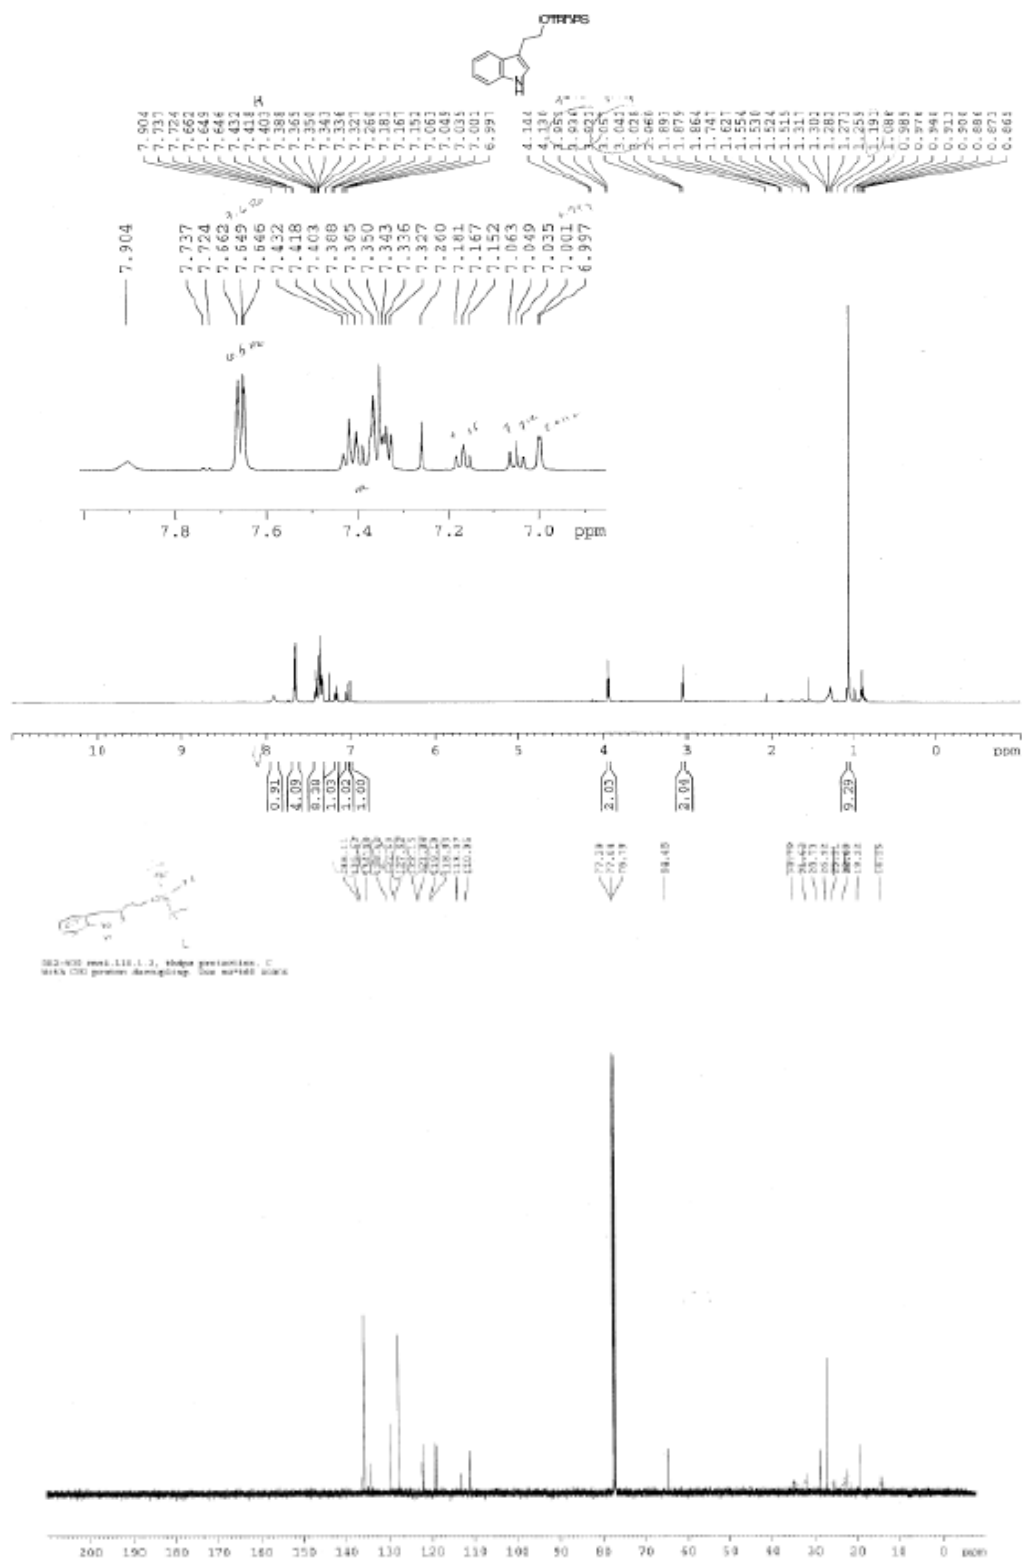

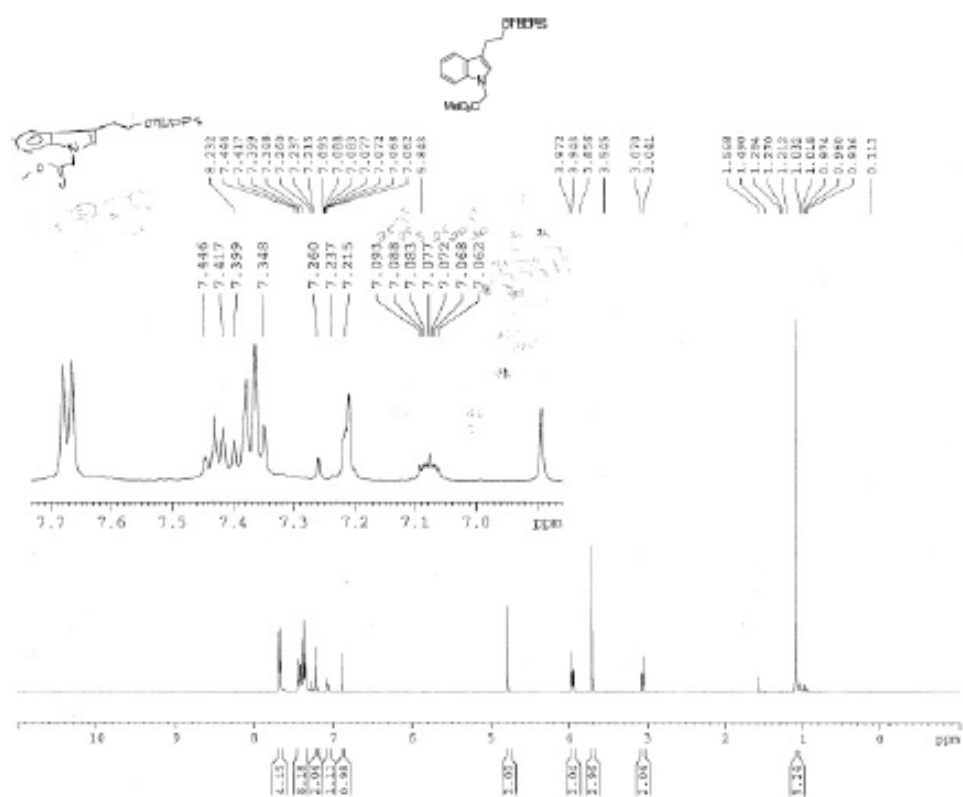







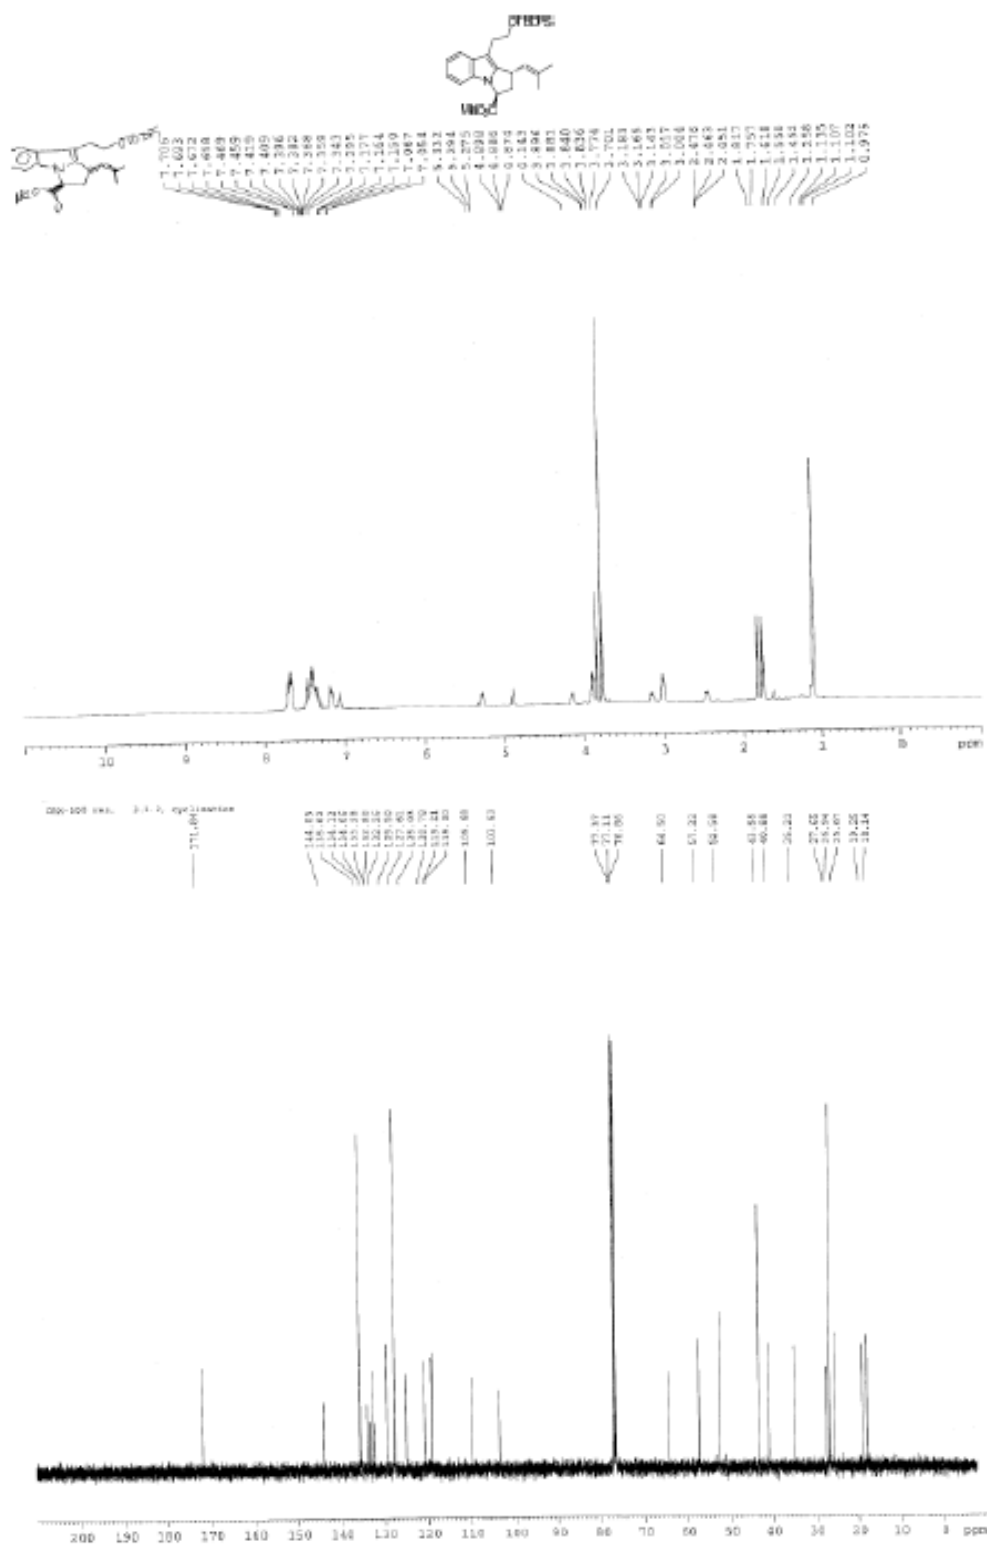

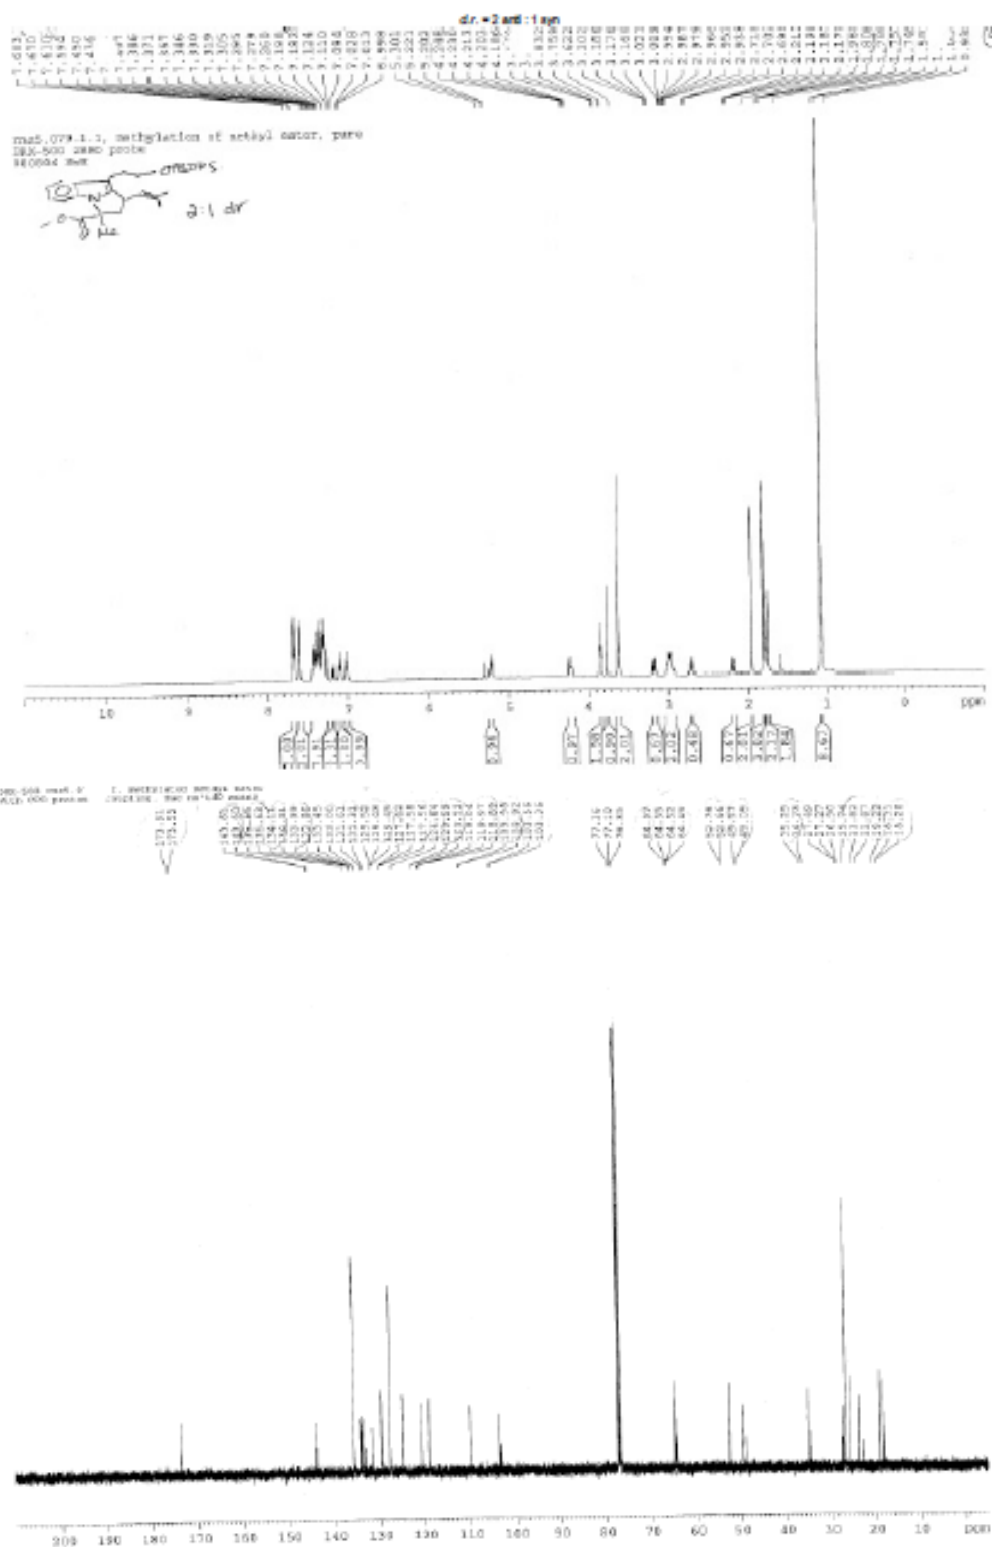

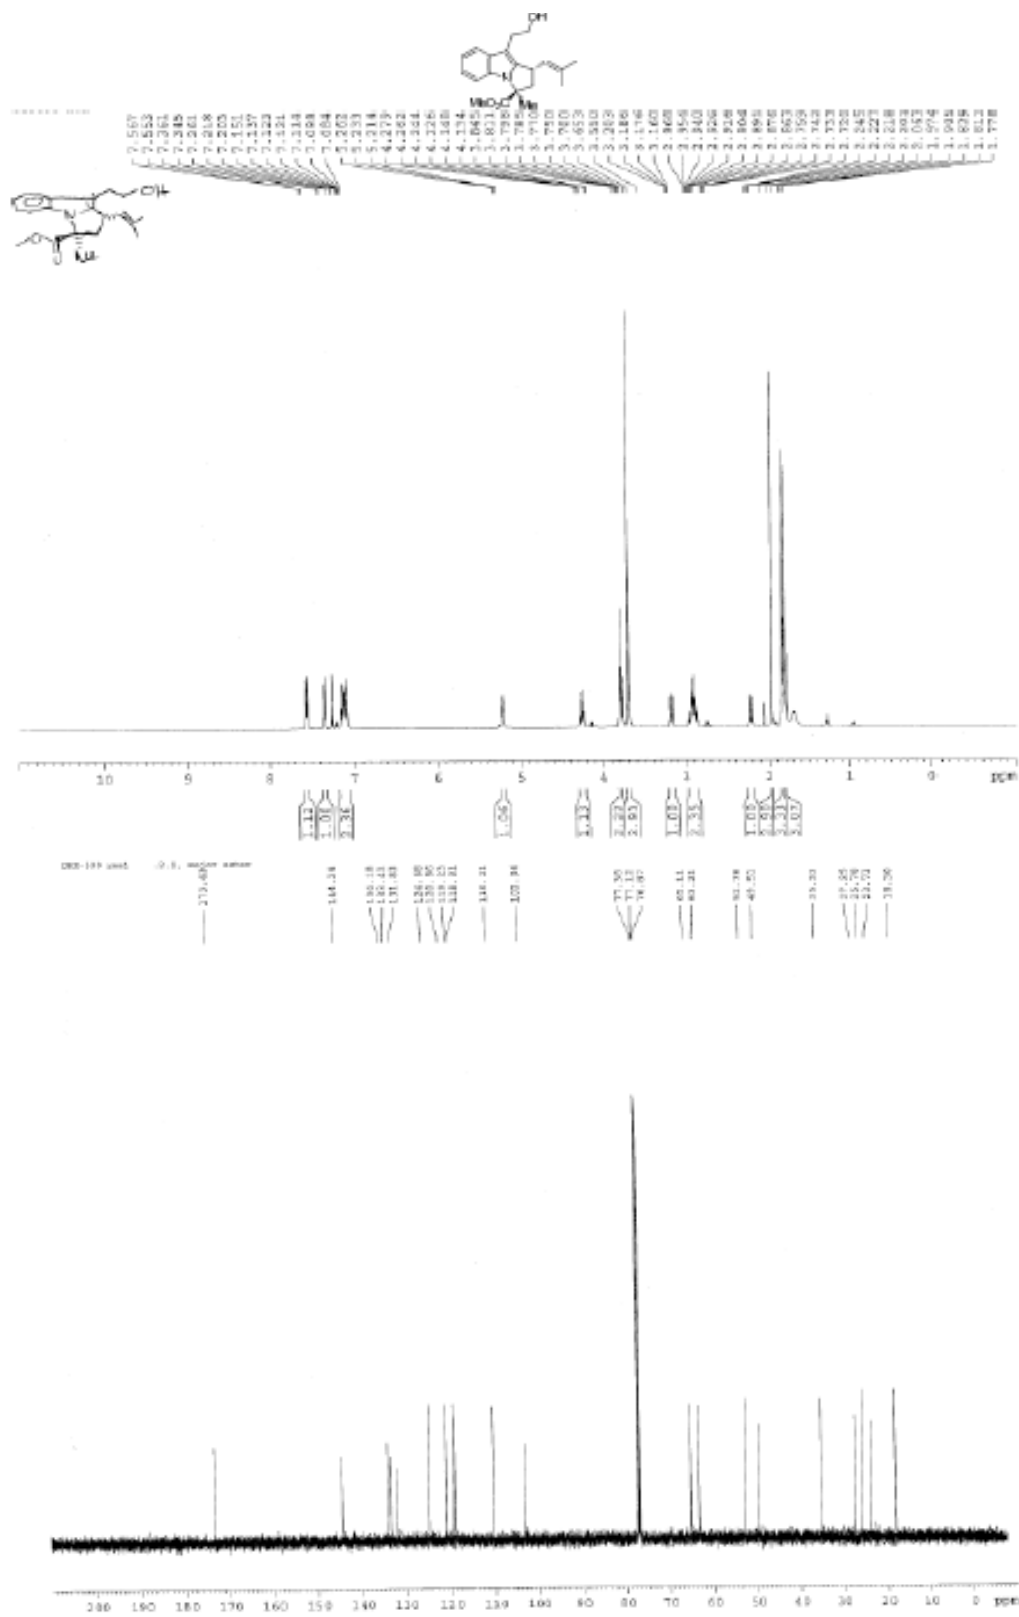

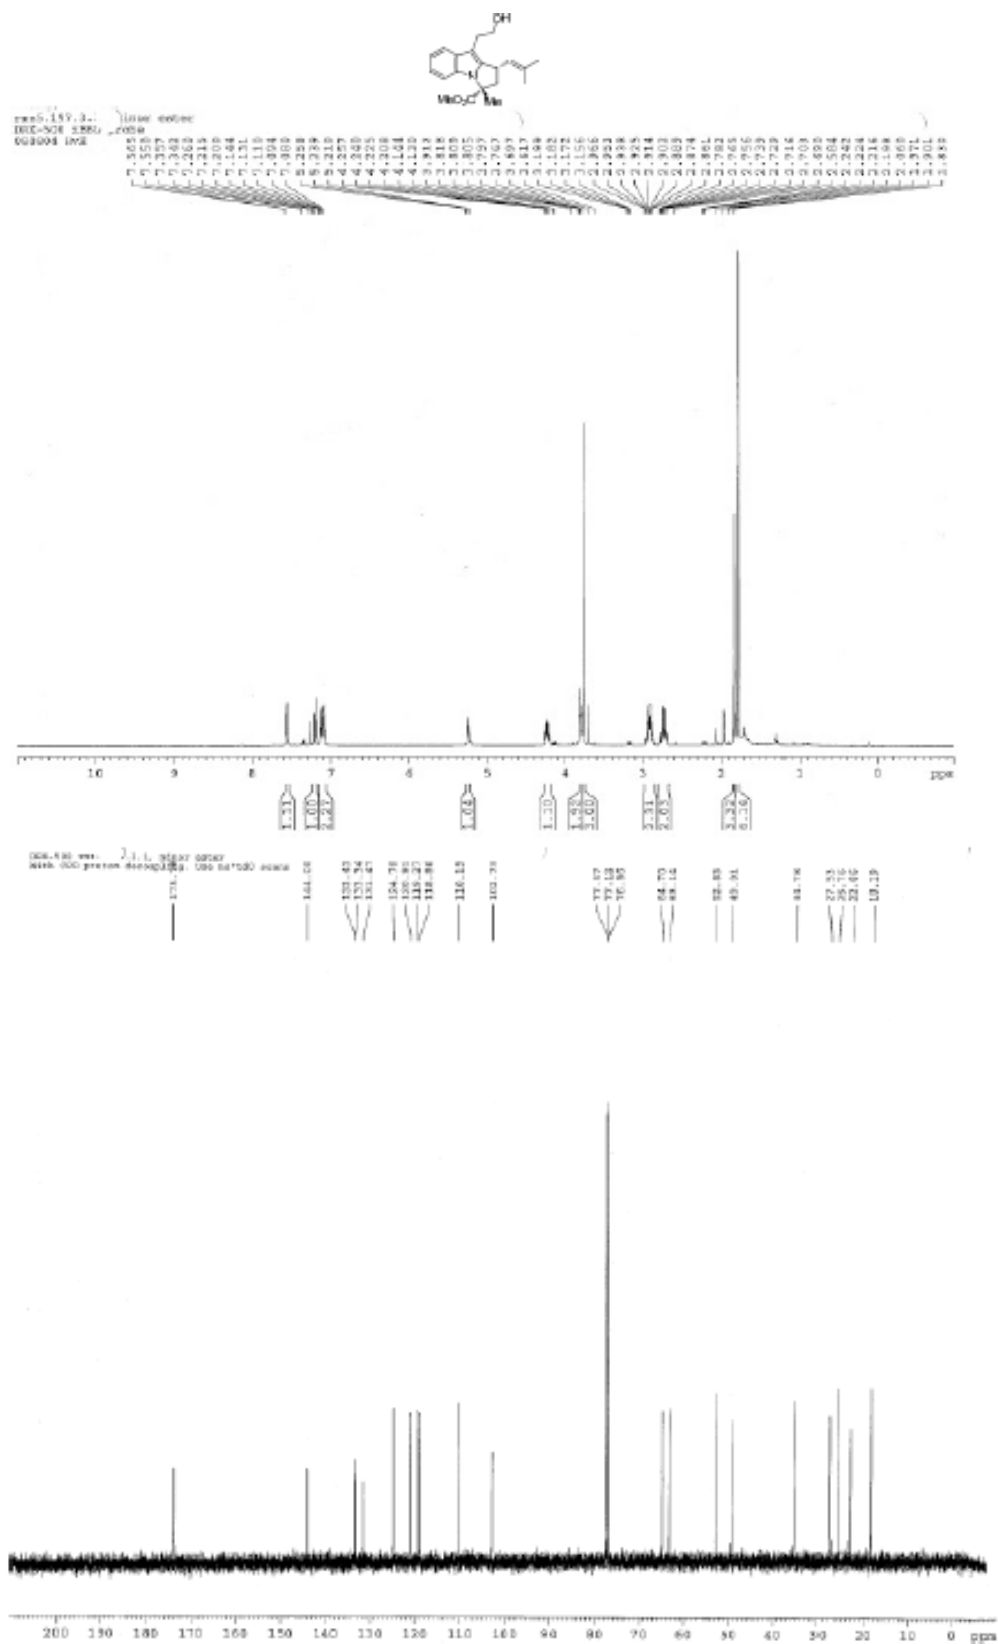

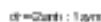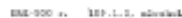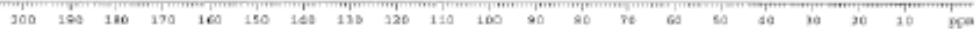

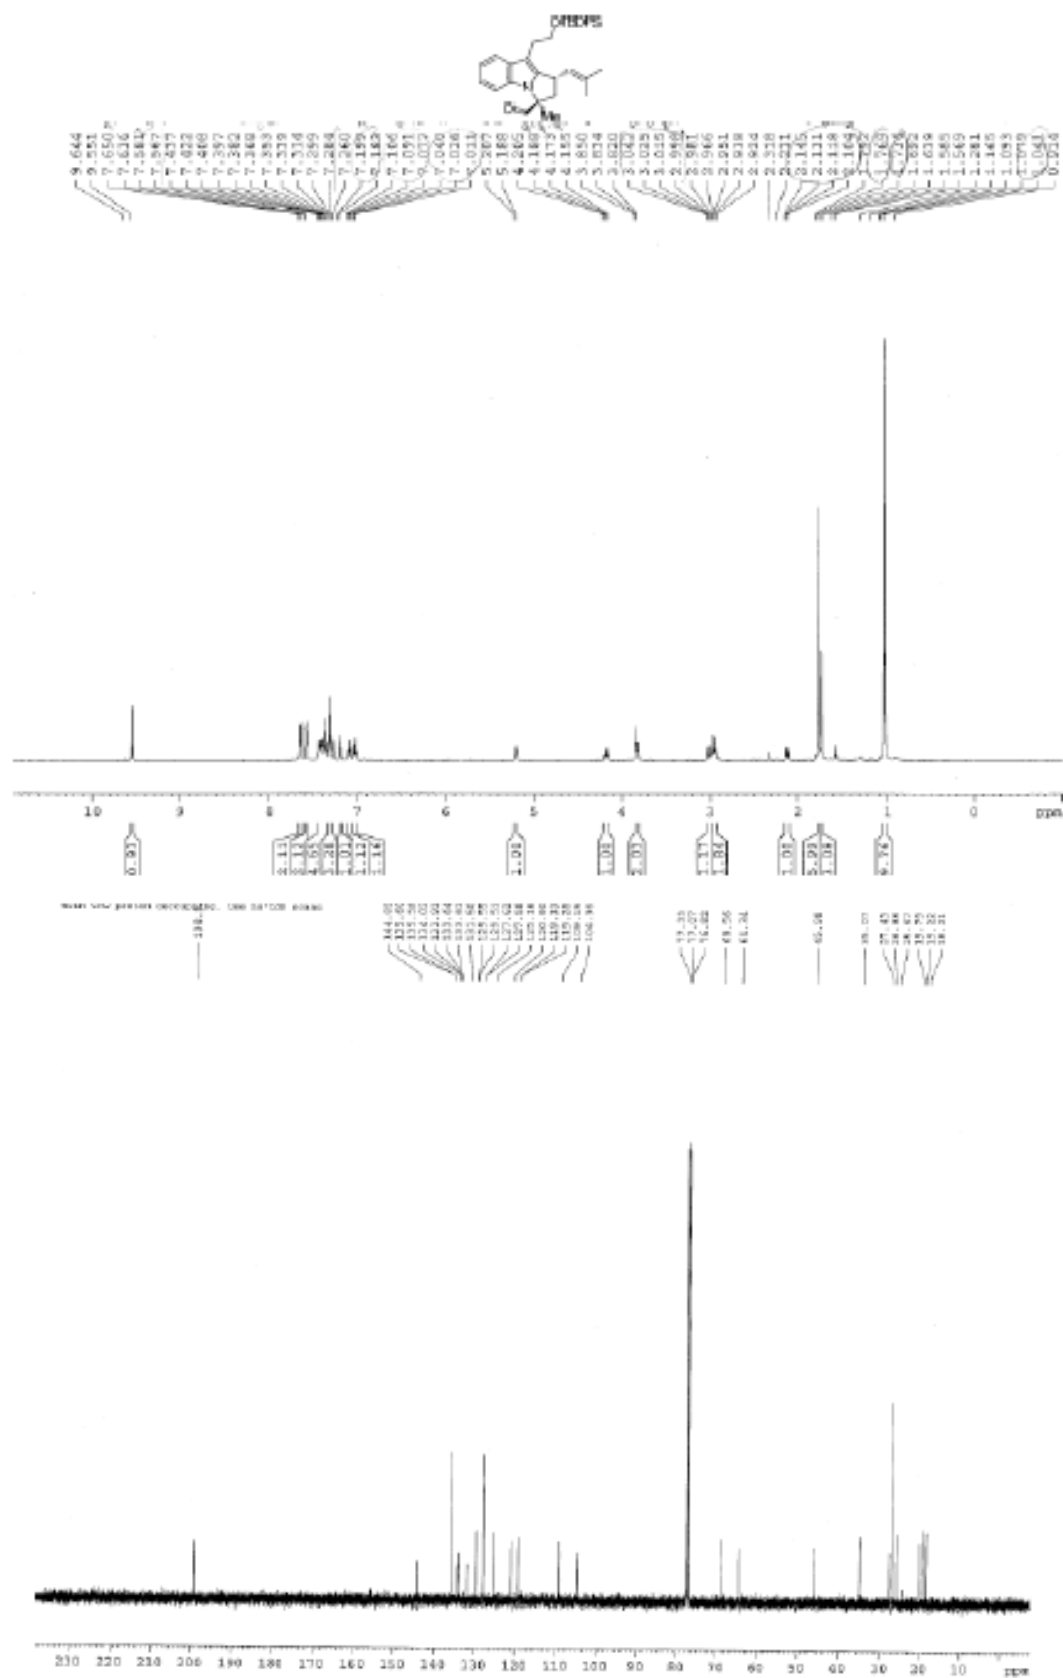



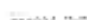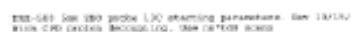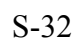

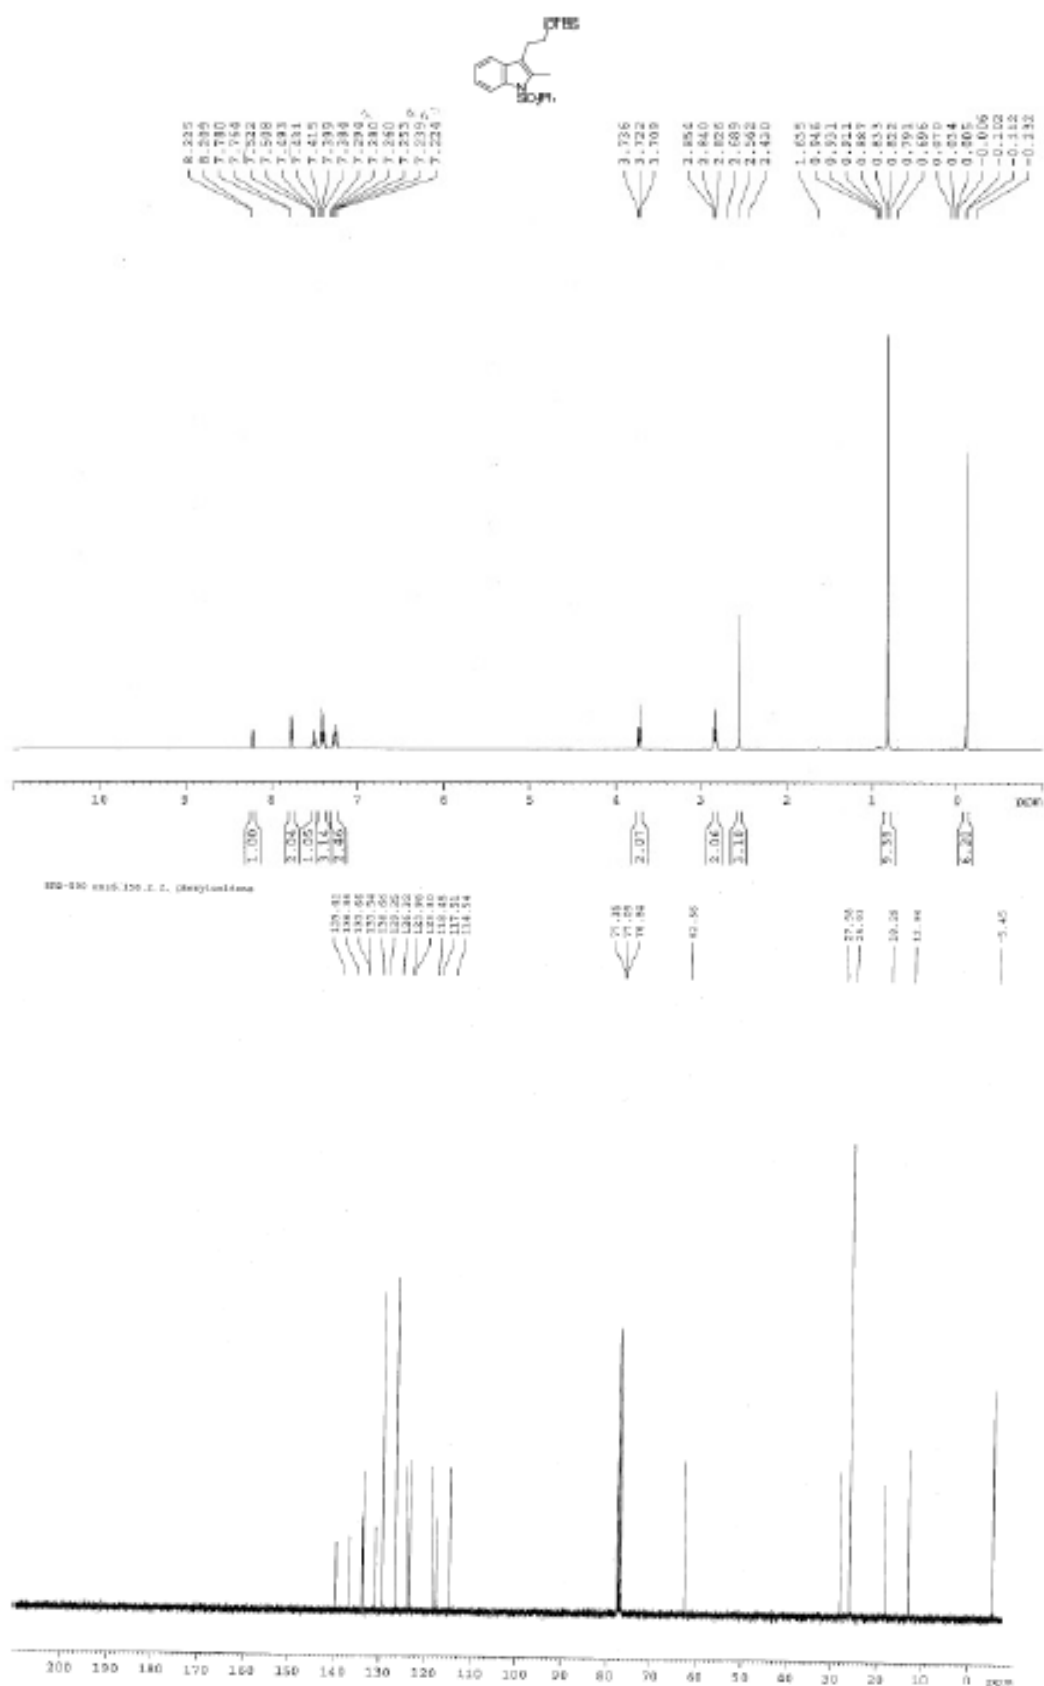













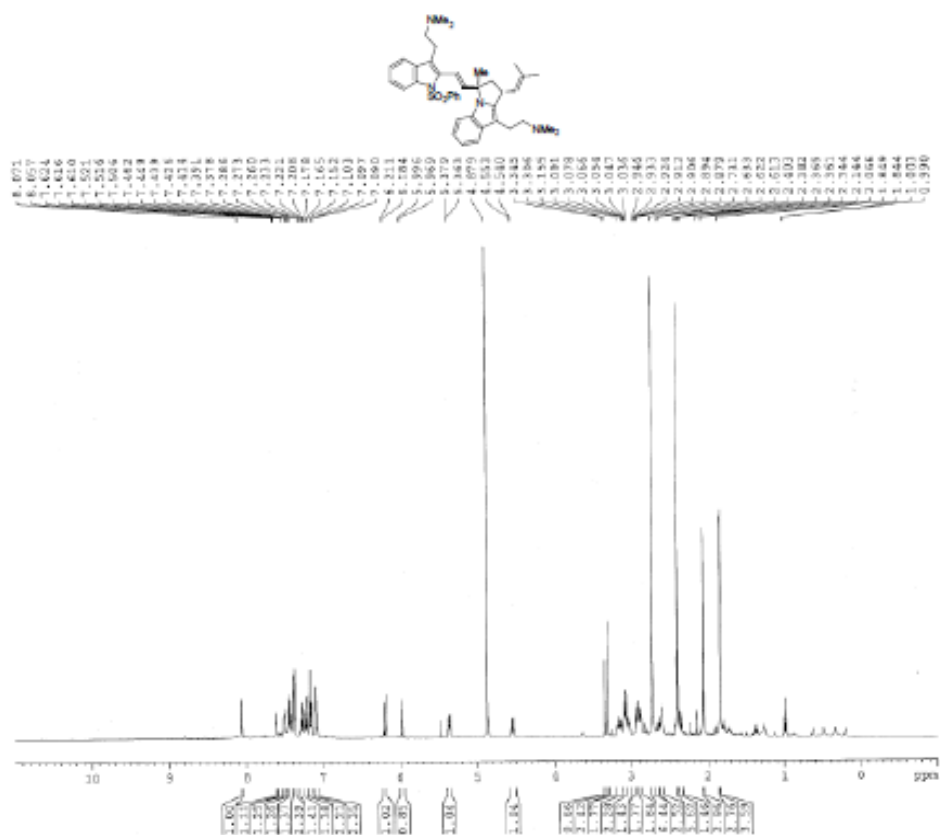





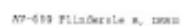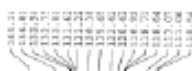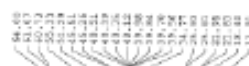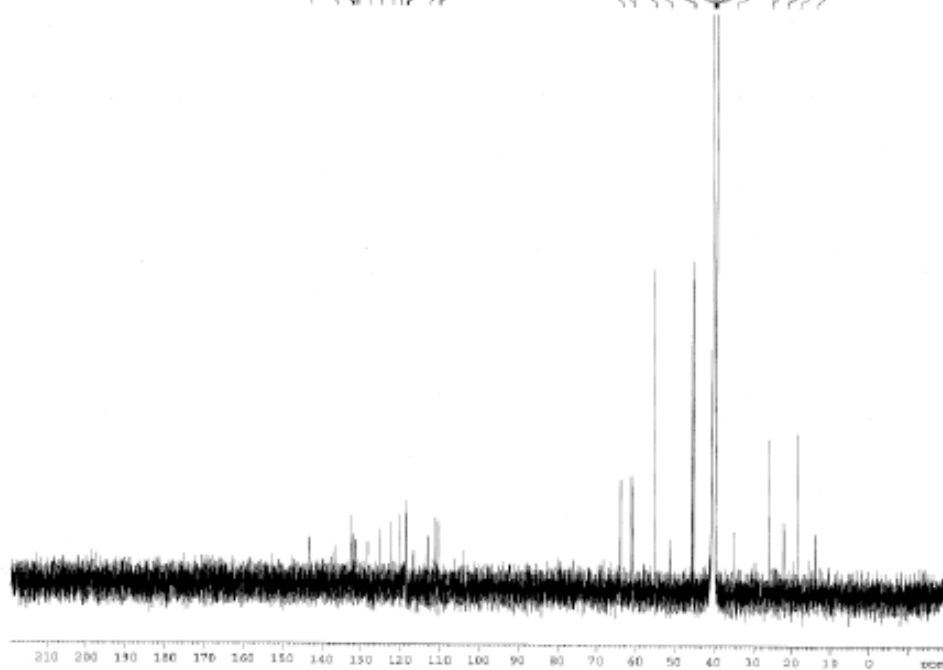

Supplement: NIHMS362199-supplement-Supporting_Info_NMR_data.pdf [file NIHMS362199-supplement-Supporting_Info_NMR_data.pdf]
